# Supplementary material
Source: publisher site journal article supplement (https://www.dovepress.com/get_supplementary_file.php?f=224315.docx)
Supplement: Supplementary file 2 [file get_supplementary_file.php]

**Results and discussion**

***Optimization of uncross-linked zein nanofibrous scaffolds***

Aqueous ethanol has been described as a solvent for zein electro-spinning, for its relative nontoxic nature. However, the high volatility of such a solvent promotes rapid evaporation of the mixed aqueous ethanol solution which produced ribbon-shaped nanofibers.[1](#_ENREF_1),[2](#_ENREF_2) DMF possesses a high boiling point at (~153 °C), high dielectric constant, high electric conductivity and low vapor pressure which can significantly enhance the electro-spinning process of zein. Thus, addition of DMF was reported to facilitate the transformation of particles electrospraying to electrospinning with a reduced nanofibers diameter.[3](#_ENREF_3) Nanofibrous zein meshes without bead defects were produced previously using DMF as a solvent, where the surface morphology clearly showed round-shaped fibers.[4](#_ENREF_4) In this regard, zein was dissolved in DMF solvent to prepare electrospun scaffolds with diameter lying in the nanometer range. Different concentrations of zein solution (15, 25 and 50 (w/w, %)) were electrospun using a wide range of flow rates (0.15-2.0 mL/h) and voltage values as a trail to obtain proper nanofibers formation (Table S1).

**Table S1** Properties of the zein stock solutions (mean ± SD, n =3)

| **Zein Concentration**  **(w/v %)** | **Flow rate**  **(mL/h)** | **Spinning observation** |
| --- | --- | --- |
| 15 | 0.15 | No fiber formed |
| 1.0 | No fiber formed |
| 2.0 | No fiber formed |
| 25 | 0.15 | Fibers formed with beads |
| 0.30 | No fiber formed |
| 1.0 | No fiber formed |
| 50 | 0.15 | Good fibers formed |
| 0.30 | Deformed fibers |
| 0.70 | Fibers formed with beads |

References

1. Yao C, Li X, Song T. Electrospinning and crosslinking of zein nanofiber mats. *Journal of Applied Polymer Science.* 2007;103(1):380-385.

2. Miyoshi T, Toyohara K, Minematsu H. Preparation of ultrafine fibrous zein membranes via electrospinning. *Polymer international.* 2005;54(8):1187-1190.

3. Du L, Xu H, Zhang Y, Zou F. Electrospinning of polycaprolatone nanofibers with DMF additive: The effect of solution proprieties on jet perturbation and fiber morphologies. *Fibers and Polymers.* 2016;17(5):751-759.

4. Jiang H, Zhao P, Zhu K. Fabrication and characterization of zein‐based nanofibrous scaffolds by an electrospinning method. *Macromolecular bioscience.* 2007;7(4):517-525.
